# Supplementary material for: ZmARF1 positively regulates low phosphorus stress tolerance via modulating lateral root development in maize
Source: PLoS Genet. 2024 Feb 5;20(2):e1011135. doi: 10.1371/journal.pgen.1011135 (PMC10868794; doi:10.1371/journal.pgen.1011135)
Supplement: S2 Table — (XLSX) [file pgen.1011135.s012.xlsx]

## Sheet: Sheet1
S2 Table. SNP polymorphisms of ZmARF1 in 356 maize inbreds
Number	Site	Loci Position	Genotype	Regions
1	111	chr1.S_190546692	G/C	UTR
2	154	chr1.S_190546735	G/A	UTR
3	267	chr1.S_190546848	G/C	extron
4	478	chr1.S_190547059	C/G	intron
5	1088	chr1.S_190547669	C/G	intron
6	1243	chr1.S_190547824	C/T	intron
7	1259	chr1.S_190547840	C/T	intron
8	1803	chr1.S_190548384	A/T	intron
9	1817	chr1.S_190548398	A/G	intron
10	1851	chr1.S_190548432	C/T	intron
11	1968	chr1.S_190548549	C/T	intron
12	2134	chr1.S_190548715	T/C	intron
13	2166	chr1.S_190548747	C/T	extron
14	2270	chr1.S_190548851	A/G	intron
15	2390	chr1.S_190548971	C/T	intron
16	2908	chr1.S_190549489	T/C	intron
17	3638	chr1.S_190550219	G/A	intron
18	3666	chr1.S_190550247	T/C	intron
19	3671	chr1.S_190550252	G/A	intron
20	3732	chr1.S_190550313	A/G	intron
21	3771	chr1.S_190550352	T/G	intron
22	4132	chr1.S_190550713	G/A	intron
23	4177	chr1.S_190550758	T/A	intron
24	4239	chr1.S_190550820	C/G	intron
25	4260	chr1.S_190550841	T/C	intron
26	4343	chr1.S_190550924	C/T	intron
27	11361	chr1.S_190557947	A/G	intron
28	11608	chr1.S_190558194	A/G	extron
29	12605	chr1.S_190558389	T/C	intron
30	12605	chr1.S_190559191	G/A	intron
31	12939	chr1.S_190559525	G/A	extron
32	13022	chr1.S_190559608	C/G	extron
33	13228	chr1.S_190559814	A/G	extron
34	13656	chr1.S_190560242	A/G	extron
35	13824	chr1.S_190560410	G/T	extron
36	13916	chr1.S_190560502	G/A	extron
37	13919	chr1.S_190560505	C/A	extron
38	13941	chr1.S_190560527	G/A	extron
39	13980	chr1.S_190560566	C/T	extron
40	14022	chr1.S_190560608	G/A	extron
41	14037	chr1.S_190560623	G/A	extron
42	14055	chr1.S_190560641	C/T	extron
43	14106	chr1.S_190560692	T/C	extron
44	14193	chr1.S_190560779	C/T	extron
45	14301	chr1.S_190560887	G/A	extron
46	14354	chr1.S_190560940	T/C	extron
47	14408	chr1.S_190560994	G/T	intron
48	14443	chr1.S_190561029	C/G	intron
49	14488	chr1.S_190561074	T/C	extron
50	14530	chr1.S_190561116	T/G	extron
51	14557	chr1.S_190561143	C/T	extron
52	14593	chr1.S_190561179	A/G	extron
53	14620	chr1.S_190561206	C/T	extron
54	14852	chr1.S_190561438	C/T	intron
55	14874	chr1.S_190561460	A/G	intron
56	14995	chr1.S_190561581	T/C	extron
57	14996	chr1.S_190561582	C/G	extron
58	15013	chr1.S_190561599	T/C	extron
59	15028	chr1.S_190561614	G/A	extron
60	15034	chr1.S_190561620	T/C	extron
61	15070	chr1.S_190561656	T/G	extron
62	15074	chr1.S_190561660	C/T	extron
63	15088	chr1.S_190561674	T/C	extron
64	15092	chr1.S_190561678	A/G	extron
65	15105	chr1.S_190561691	C/A	extron
66	15169	chr1.S_190561755	A/G	extron
67	15173	chr1.S_190561759	G/A	extron
68	15180	chr1.S_190561766	T/A	extron
69	15183	chr1.S_190561769	T/A	extron
70	15184	chr1.S_190561770	A/G	extron
71	15185	chr1.S_190561771	A/C	extron
72	15248	chr1.S_190561834	A/G	extron
73	15249	chr1.S_190561835	G/C	extron
74	15252	chr1.S_190561838	T/C	extron
75	15275	chr1.S_190561861	A/G	extron
76	15304	chr1.S_190561890	T/C	extron
77	15325	chr1.S_190561911	T/C	extron
78	15331	chr1.S_190561917	C/A	extron
79	15341	chr1.S_190561927	T/C	UTR
80	15373	chr1.S_190561959	T/A	UTR
81	15403	chr1.S_190561989	A/G	UTR
